# Supplementary material for: Spatiotemporal Evolution and Emergence of Frontier Malaria Mosaics in the Brazilian Amazon
Source: Research Square preprint supplement (doi:10.21203/rs.3.rs-9919747/v1), 2026-06-09
Supplement: Supplementary file 1 [file 0699be474d93111cd858243d.docx]

**Supplementary Information for**

Spatiotemporal Evolution and Emergence of Frontier Malaria Mosaics in the Brazilian Amazon

Alisson F. Barbieri, Reinaldo O. Santos, Getúlio F. Domingues, Mark M. Janko, Richard E. A. Moreira, William K. Pan.

*Alisson F. Barbieri

**Email:**  barbieri.alisson@gmail.com

Tables

Table S1. Main epidemiological characteristics of frontier malaria regions according to governmental periods

| *Region* | *Period* | *Malaria cases* | *Autochthonous cases (%)* | *Imported cases[[1]](#footnote-1) (%)* | *P. falciparum and mixed (%)* | *P. Vivax (%)* |
| --- | --- | --- | --- | --- | --- | --- |
| Northwestern (NWFM) | 2007-2010 | 427,167 | 64.23% | 1.86% | 15.97% | 84.03% |
| 2011-2014 | 236,537 | 64.63% | 5.46% | 10.69% | 89.31% |
| 2015-2018 | 269,687 | 67.28% | 3.97% | 9.51% | 90.49% |
| 2019-2022 | 290,637 | 66.10% | 1.86% | 17.97% | 82.03% |
| 2023 | 79,595 | 70.06% | 1.81% | 19.82% | 80.18% |
|  | 2007-2023 | 1,303,623 | 65.71% | 2.95% | 14.36% | 85.64% |
| Southeastern (SEFM) | 2007-2010 | 7,160 | 42.46% | 2.25% | 25.38% | 74.62% |
| 2011-2014 | 4,122 | 38.77% | 1.84% | 13.22% | 86.78% |
| 2015-2018 | 1,641 | 57.34% | 3.11% | 3.66% | 96.34% |
| 2019-2022 | 3,949 | 21.60% | 0.63% | 2.89% | 97.11% |
| 2023 | 1,117 | 36.44% | 1.25% | 5.28% | 94.72% |
| 2007-2023 | 17,989 | 38.02% | 1.82% | 14.43% | 85.57% |
| Southwestern (SWFM) | 2007-2010 | 528,079 | 74.44% | 0.19% | 15.85% | 84.15% |
| 2011-2014 | 298,396 | 75.70% | 0.17% | 16.35% | 83.65% |
| 2015-2018 | 218,698 | 77.26% | 0.17% | 16.23% | 83.77% |
| 2019-2022 | 169,115 | 67.60% | 0.36% | 12.98% | 87.02% |
| 2023 | 33,607 | 69.38% | 0.46% | 13.81% | 86.19% |
| 2007-2023 | 1,247,895 | 74.17% | 0.21% | 15.59% | 84.41% |
| Northern (NOFM) | 2007-2010 | 426,364 | 66.42% | 3.18% | 19.28% | 80.72% |
| 2011-2014 | 279,171 | 66.21% | 2.20% | 17.24% | 82.76% |
| 2015-2018 | 157,532 | 71.08% | 1.10% | 6.13% | 93.87% |
| 2019-2022 | 101,460 | 59.81% | 0.52% | 9.80% | 90.20% |
| 2023 | 22,948 | 49.17% | 0.77% | 15.19% | 84.81% |
| 2007-2023 | 987,475 | 66.03% | 2.24% | 15.53% | 84.47% |
| Northeastern (NEFM) | 2007-2010 | 10,115 | 30.42% | 36.60% | 41.69% | 58.31% |
| 2011-2014 | 4,733 | 9.63% | 67.25% | 27.83% | 72.17% |
| 2015-2018 | 2,238 | 11.75% | 61.13% | 14.39% | 85.61% |
| 2019-2022 | 3,076 | 4.32% | 19.15% | 13.26% | 86.74% |
| 2023 | 935 | 0.86% | 13.90% | 15.51% | 84.49% |
| 2007-2023 | 21,097 | 18.66% | 42.53% | 30.38% | 69.62% |
| All Frontiers (Total) | 2007-2010 | 1,398,885 | 68.40% | 1.88% | 17.17% | 82.83% |
| 2011-2014 | 822,959 | 68.73% | 2.77% | 15.08% | 84.92% |
| 2015-2018 | 649,796 | 71.35% | 2.19% | 10.95% | 89.05% |
| 2019-2022 | 568,237 | 64.78% | 1.26% | 14.90% | 85.10% |
| 2023 | 138,202 | 65.69% | 1.38% | 17.44% | 82.56% |
|  | 2007-2023 | 3,578,079 | 68.18% | 2.03% | 15.23% | 84.77% |

**Table S2.** Main socioeconomic and demographic characteristics of frontier malaria regions according to governmental periods

| *Region* | *Period* | *Infected men (%)* | *Infected women (%)* | *Infected at age 15-39 (%)* | *Infected indigenous* (%)* | *Infected black* (%)* | *Infected white* (%)* |
| --- | --- | --- | --- | --- | --- | --- | --- |
| Northwestern (NWFM) | 2007-2010 | 59.56% | 40.42% | 42.43% | 0.00% | 0.01% | 0.00% |
| 2011-2014 | 59.49% | 40.51% | 43.31% | 23.11% | 45.09% | 4.19% |
| 2015-2018 | 59.22% | 40.78% | 42.55% | 40.52% | 51.58% | 3.34% |
| 2019-2022 | 58.62% | 41.38% | 43.47% | 49.99% | 46.08% | 2.65% |
| 2023 | 56.93% | 43.07% | 41.61% | 59.79% | 38.24% | 1.79% |
|  | 2007-2023 | 59.11% | 40.89% | 42.80% | 27.37% | 31.46% | 2.15% |
| Southeastern (SEFM) | 2007-2010 | 70.45% | 29.53% | 51.33% | 0.00% | 0.03% | 0.01% |
| 2011-2014 | 71.40% | 28.60% | 50.51% | 26.66% | 46.75% | 19.43% |
| 2015-2018 | 67.34% | 32.66% | 49.73% | 51.49% | 39.31% | 8.65% |
| 2019-2022 | 73.36% | 26.64% | 55.96% | 19.12% | 64.70% | 15.47% |
| 2023 | 69.56% | 30.44% | 55.06% | 29.90% | 57.39% | 12.18% |
| 2007-2023 | 70.97% | 29.02% | 52.24% | 16.86% | 32.08% | 9.40% |
| Southwestern (SWFM) | 2007-2010 | 61.31% | 38.67% | 45.90% | 0.00% | 0.01% | 0.00% |
| 2011-2014 | 59.93% | 40.06% | 45.84% | 7.26% | 61.14% | 8.89% |
| 2015-2018 | 58.71% | 41.29% | 45.76% | 6.31% | 85.98% | 6.94% |
| 2019-2022 | 62.33% | 37.67% | 47.60% | 16.99% | 73.13% | 8.98% |
| 2023 | 62.06% | 37.94% | 46.16% | 23.14% | 68.05% | 8.25% |
| 2007-2023 | 60.68% | 39.31% | 46.10% | 5.77% | 41.43% | 4.78% |
| Northern (NOFM) | 2007-2010 | 63.39% | 36.60% | 47.55% | 0.00% | 0.02% | 0.00% |
| 2011-2014 | 63.20% | 36.80% | 48.13% | 3.90% | 70.89% | 6.92% |
| 2015-2018 | 62.04% | 37.96% | 47.96% | 4.54% | 87.59% | 7.08% |
| 2019-2022 | 64.60% | 35.40% | 49.55% | 7.30% | 83.78% | 8.25% |
| 2023 | 68.45% | 31.55% | 52.39% | 6.58% | 84.31% | 8.72% |
| 2007-2023 | 63.36% | 36.63% | 48.10% | 2.73% | 44.59% | 4.14% |
| Northeastern (NEFM) | 2007-2010 | 74.04% | 25.91% | 66.41% | 0.00% | 0.04% | 0.00% |
| 2011-2014 | 83.18% | 16.82% | 74.22% | 1.18% | 76.74% | 13.59% |
| 2015-2018 | 82.08% | 17.92% | 70.69% | 6.34% | 80.16% | 11.35% |
| 2019-2022 | 86.96% | 13.04% | 70.03% | 2.89% | 83.88% | 12.06% |
| 2023 | 86.10% | 13.90% | 71.55% | 0.75% | 85.88% | 12.73% |
| 2007-2023 | 79.36% | 20.61% | 69.37% | 1.39% | 41.77% | 6.57% |
| All Frontiers (Total) | 2007-2010 | 61.55% | 38.44% | 45.52% | 0.00% | 0.01% | 0.00% |
| 2011-2014 | 61.10% | 38.89% | 46.08% | 10.74% | 59.85% | 6.95% |
| 2015-2018 | 59.83% | 40.17% | 45.06% | 20.19% | 71.96% | 5.50% |
| 2019-2022 | 61.05% | 38.95% | 46.01% | 32.08% | 61.19% | 5.67% |
| 2023 | 60.39% | 39.61% | 44.82% | 41.40% | 53.62% | 4.67% |
|  | 2007-2023 | 61.06% | 38.93% | 45.66% | 12.80% | 38.57% | 3.70% |

* Information on race/ethnicity was absent in 2007-2010 and had high underreporting (21,33%) in 2011-2014.

**Table S3.** Independence test and Cramer's V statistic

| Analysis | Chi2 | p value | Cramer's V | Cramer's V classes |
| --- | --- | --- | --- | --- |
| Region ×  Period | 53078.64 | < 0.00001 | 0.1153 | Weak/Small association |
| Region ×  Allochthonous + Autochthonous + Imported | 58700.98 | < 0.00001 | 0.1715 | Weak/Small association |
| Period x Allochthonous + Autochthonous + Imported | 3929.76 | < 0.00001 | 0.0444 | Negligible/No association |
| Region x Species | 839.05 | < 0.00001 | 0.0290 | Negligible/No association |
| Period x Species | 3781.36 | < 0.00001 | 0.0615 | Negligible/No association |
| Region x Sex | 2751.10 | < 0.00001 | 0.0525 | Negligible/No association |
| Period x Sex | 160.55 | < 0.00001 | 0.0127 | Negligible/No association |
| Region x Age group | 6402.22 | < 0.00001 | 0.0462 | Negligible/No association |
| Period x Age group | 2211.92 | < 0.00001 | 0.0272 | Negligible/No association |

1. Infection in another country, By default, allochthonous cases (different locality of likely infection and residence in Brazil) is the difference between total malaria cases and autochthonous cases. [↑](#footnote-ref-1)
